# Supplementary material for: When are you taking us outside? An exploratory study of the integration of the outdoor learning in preschool and primary education in Quebec
Source: Frontiers journal article supplement (doi:10.3389/fpsyg.2022.955549), 2022-10-20
Supplement: Table_1.PDF [file Table_1.PDF]

## Additional file. Focus group interview guide

### Introduction

- a) Instructions about the research project and the focus group;
- b) Filled and signed consent form;
- c) Focus group's instructions and guidelines.

Semi-structured focus group, talk time assessed by the principal investigator, maximum 90 minutes. Give concrete examples, if possible.

| Themes                                            | Sub-themes                                                                                                                                                                                                                                                                                                                                                                                                                                                                                                                                                         |
|---------------------------------------------------|--------------------------------------------------------------------------------------------------------------------------------------------------------------------------------------------------------------------------------------------------------------------------------------------------------------------------------------------------------------------------------------------------------------------------------------------------------------------------------------------------------------------------------------------------------------------|
| Introduction                                      | <p>Could you discuss about the outdoors activities you provide to your students?</p> <p>Where are your outdoor classes with your students taking place?</p> <p>Since when have you integrated outdoors into your teaching practice?</p>                                                                                                                                                                                                                                                                                                                            |
| Perception of the outdoors                        | <p>What does outdoors mean to you?</p> <p>What motivates you/what are the reasons that are pushing you to integrate outdoors into your practice?</p> <ul style="list-style-type: none"> <li>According to you, what elements would bring a teacher to use outdoors into his or her teaching practice?</li> </ul>                                                                                                                                                                                                                                                    |
| Uses of OL                                        | <p>Could you describe the top three outdoors environments that you visited the most with your students during the year?</p> <ul style="list-style-type: none"> <li>According to seasons (fall/winter/spring)</li> <li>According to its proximity or farness</li> </ul> <p>What are the school subjects, the means of action, the learning tasks or the types of activities that you offer to your students during an outdoors class?</p> <ul style="list-style-type: none"> <li>During the last year</li> <li>According to seasons (fall/winter/spring)</li> </ul> |
| Teaching strategies and factors that influence OL | <p>What are the facilitators and the barriers to the integration of outdoors into the teaching practice in your school?</p> <ul style="list-style-type: none"> <li>As a teacher?</li> <li>Into the school team ?</li> <li>From an administrative point of view?</li> </ul> <p>What are the stakes you encounter when you bring your students outside? (e.g., dressing up, gear, rules)</p> <ul style="list-style-type: none"> <li>Fall/winter/spring</li> </ul>                                                                                                    |

|            |                                                                                                                                                                                                                                                         |
|------------|---------------------------------------------------------------------------------------------------------------------------------------------------------------------------------------------------------------------------------------------------------|
|            | <p>What organization routines do you use when you teach inside? Outside?</p> <ul style="list-style-type: none"><li>• Differences and similarities</li></ul> <p>What are the main strengths of a planification/preparation of a class given outside?</p> |
| Conclusion | <p>Additional comments or themes not covered that you would like to discuss?</p> <p>Thank participants for their time</p>                                                                                                                               |
